# Supplementary material for: Lives of Skin Lesions in Monkeypox: Histomorphological, Immunohistochemical, and Clinical Correlations in a Small Case Series
Source: MDPI journal article supplement (doi:10.3390/v15081748), 2023-08-15
Supplement: s1 [file s1]

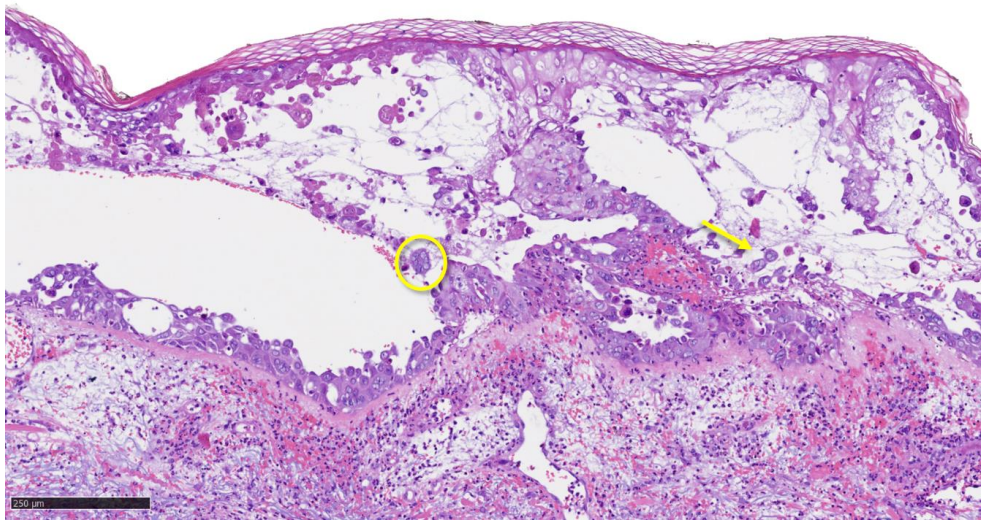

**Supplementary Figure S1.** Histological picture of a herpes infection of the skin. Extensive acantholysis with multinucleated cells (yellow circle) and evidence of steel-gray nuclei with marginalization of chromatin (yellow arrow) support a diagnosis of herpes infection. Stain: hematoxylin and eosin, scale bar 250 μm
